# Supplementary material for: Community socioeconomic disadvantage drives type of 30-day medical-surgical revisits among patients with serious mental illness
Source: BMC Health Serv Res. 2021 Jul 5;21:653. doi: 10.1186/s12913-021-06605-y (PMC8256502; doi:10.1186/s12913-021-06605-y)
Supplement: Supplementary file 1 — Additional file 1. [file 12913_2021_6605_MOESM1_ESM.docx]

Supplementary File 1. CCS Categories for Mental Illness, ICD-9 Codes for Planned Admissions, and CCS Categories for Planned Admissions

AHRQ CCS Categories for Serious Mental Illness

| 650 |
| --- |
| 651 |
| 652 |
| 654 |
| 655 |
| 656 |
| 657 |
| 658 |
| 659 |
| 663 |
| 670 |
| 660 |
| 661 |
| 663 |

ICD-9 Codes Used to Identify Planned Admissions

| | 650 | | --- | | 65100 | | 65101 | | 65103 | | 65110 | | 65111 | | 65113 | | 65120 | | 65121 | | 65123 | | 65130 | | 65131 | | 65133 | | 65140 | | 65141 | | 65143 | | 65150 | | 65151 | | 65153 | | 65160 | | 65161 | | 65163 | | 65170 | | 65171 | | 65173 | | 65180 | | 65181 | | 65183 | | 65190 | | 65191 | | 65193 | | 65200 | | 65201 | | 65203 | | 65210 | | 65211 | | 65213 | | 65220 | | 65221 | | 65223 | | 65230 | | 65231 | | 65233 | | 67012 | | 67014 | | 67020 | | 67022 | | 67024 | | 67030 | | 67032 | | 67034 | | 67080 | | 67082 | | 67084 | |  | | | 65240 | | --- | | 65241 | | 65243 | | 65250 | | 65251 | | 65253 | | 65260 | | 65261 | | 65263 | | 65270 | | 65271 | | 65273 | | 65280 | | 65281 | | 65283 | | 65290 | | 65291 | | 65293 | | 65300 | | 65301 | | 65303 | | 65310 | | 65311 | | 65313 | | 65320 | | 65321 | | 65323 | | 65330 | | 65331 | | 65333 | | 65340 | | 65341 | | 65343 | | 65350 | | 65351 | | 65353 | | 65360 | | 65361 | | 65363 | | 65370 | | 65371 | | 65373 | | 65380 | |  | | | 65381  65383 | | --- | | 65390 | | 65391 | | 65393 | | 65400 | | 65401 | | 65402 | | 65403 | | 65404 | | 65410 | | 65411 | | 65412 | | 65413 | | 65414 | | 65420 | | 65421 | | 65423 | | 65430 | | 65431 | | 65432 | | 65433 | | 65434 | | 65440 | | 65441 | | 65442 | | 65443 | | 65444 | | 65450 | | 65451 | | 65452 | | 65453 | | 65454 | | 65460 | | 65461 | | 65462 | | 65463 | | 65464 | | 65470 | | 65471 | | 65472 | | 65473 | | 65474 | |  | |  | | | 65480 | | --- | | 65481 | | 65482 | | | 65483 | | | 65484 | | | 65490 | | | 65491 | | | 65492 | | | 65493 | | | 65494 | | | 65500 | | | 65501 | | | 65503 | | | 65510 | | | 65511 | | | 65513 | | | 65520 | | | 65521 | | | 65523 | | | 65530 | | | 65531 | | | 65533 | | | 65540 | | | 65541 | | | 65543 | | | 65550 | | | 65551 | | | 65553 | | | 65560 | | | 65561 | | | 65563 | | | 65570 | | | 65571 | | | 65573 | | | 65580 | | | 65581 | | | 65583 | | | 65590 | | | 65591 | | | 65593 | | | 65600 | | | 65601 | | | 65603 | | |  | | |  | | | | 65610 | | --- | | 65611 | | 65613 | | 65620 | | 65621 | | 65623 | | 65630 | | 65631 | | 65633 | | 65640 | | 65641 | | 65643 | | 65650 | | 65651 | | 65653 | | 65660 | | 65661 | | 65663 | | 65670 | | 65671 | | 65673 | | 65680 | | 65681 | | 65683 | | 65690 | | 65691 | | 65693 | | 65700 | | 65701 | | 65703 | | 65800 | | 65801 | | 65803 | | 65810 | | 65811 | | 65813 | | 65820 | | 65821 | | 65823 | | 65830 | | 65831 | | 65833 | | 65840 | |  | |  | | | 65841 | | --- | | 65843 | | 65880 | | 65881 | | 65883 | | 65890 | | 65891 | | 65893 | | 65900 | | 65901 | | 65903 | | 65910 | | 65911 | | 65913 | | 65920 | | 65921 | | 65923 | | 65930 | | 65931 | | 65933 | | 65940 | | 65941 | | 65943 | | 65950 | | 65951 | | 65953 | | 65960 | | 65961 | | 65963 | | 65970 | | 65971 | | 65973 | | 65980 | | 65981 | | 65983 | | 65990 | | 65991 | | 65993 | | 66000 | | 66001 | | 66003 | | 66010 | | 66011 | |  | |  | | | 66013 | | --- | | 66021 | | 66023 | | 66030 | | 66031 | | 66033 | | 66040 | | 66041 | | 66043 | | 66050 | | 66051 | | 66053 | | 66060 | | 66061 | | 66063 | | 66070 | | 66071 | | 66073 | | 66080 | | 66081 | | 66083 | | 66090 | | 66091 | | 66093 | | 66100 | | 66101 | | 66103 | | 66110 | | 66111 | | 66113 | | 66120 | | 66121 | | 66123 | | 66130 | | 66131 | | 66133 | | 66140 | | 66141 | | 66143 | | 66190 | | 66191 | | 66193 | | 66200 | |  | | 66201   | 66203 | | --- | | 66210 | | 66211 | | 66213 | | 66220 | | 66221 | | 66223 | | 66230 | | 66231 | | 66233 | | 66300 | | 66301 | | 66303 | | 66310 | | 66311 | | 66313 | | 66320 | | 66321 | | 66323 | | 66330 | | 66331 | | 66333 | | 66340 | | 66341 | | 66343 | | 66350 | | 66351 | | 66353 | | 66360 | | 66361 | | 65363 | | 66380 | | 66381 | | 66383 | | 66390 | | 66391 | | 66393 | | 67000 | | 67002 | | 67004 | | 67010 | |
| --- | --- | --- | --- | --- | --- | --- | --- | --- | --- | --- | --- | --- | --- | --- | --- | --- | --- | --- | --- | --- | --- | --- | --- | --- | --- | --- | --- | --- | --- | --- | --- | --- | --- | --- | --- | --- | --- | --- | --- | --- | --- | --- | --- | --- | --- | --- | --- | --- | --- | --- | --- | --- | --- | --- | --- | --- | --- | --- | --- | --- | --- | --- | --- | --- | --- | --- | --- | --- | --- | --- | --- | --- | --- | --- | --- | --- | --- | --- | --- | --- | --- | --- | --- | --- | --- | --- | --- | --- | --- | --- | --- | --- | --- | --- | --- | --- | --- | --- | --- | --- | --- | --- | --- | --- | --- | --- | --- | --- | --- | --- | --- | --- | --- | --- | --- | --- | --- | --- | --- | --- | --- | --- | --- | --- | --- | --- | --- | --- | --- | --- | --- | --- | --- | --- | --- | --- | --- | --- | --- | --- | --- | --- | --- | --- | --- | --- | --- | --- | --- | --- | --- | --- | --- | --- | --- | --- | --- | --- | --- | --- | --- | --- | --- | --- | --- | --- | --- | --- | --- | --- | --- | --- | --- | --- | --- | --- | --- | --- | --- | --- | --- | --- | --- | --- | --- | --- | --- | --- | --- | --- | --- | --- | --- | --- | --- | --- | --- | --- | --- | --- | --- | --- | --- | --- | --- | --- | --- | --- | --- | --- | --- | --- | --- | --- | --- | --- | --- | --- | --- | --- | --- | --- | --- | --- | --- | --- | --- | --- | --- | --- | --- | --- | --- | --- | --- | --- | --- | --- | --- | --- | --- | --- | --- | --- | --- | --- | --- | --- | --- | --- | --- | --- | --- | --- | --- | --- | --- | --- | --- | --- | --- | --- | --- | --- | --- | --- | --- | --- | --- | --- | --- | --- | --- | --- | --- | --- | --- | --- | --- | --- | --- | --- | --- | --- | --- | --- | --- | --- | --- | --- | --- | --- | --- | --- | --- | --- | --- | --- | --- | --- | --- | --- | --- | --- | --- | --- | --- | --- | --- | --- | --- | --- | --- | --- | --- | --- | --- | --- | --- | --- | --- | --- | --- | --- | --- | --- | --- | --- | --- | --- | --- | --- | --- | --- | --- | --- | --- | --- | --- | --- | --- | --- | --- | --- | --- | --- | --- | --- | --- | --- | --- | --- | --- | --- | --- | --- | --- | --- | --- | --- | --- | --- | --- | --- | --- | --- | --- | --- | --- | --- | --- | --- | --- | --- | --- | --- | --- | --- | --- | --- | --- | --- | --- | --- | --- | --- | --- | --- | --- | --- | --- | --- | --- | --- | --- | --- | --- | --- | --- | --- | --- | --- | --- | --- | --- | --- | --- | --- | --- | --- | --- | --- | --- |

AHRQ CCS categories used to identify planned admissions

| DXCCS Codes:   | 11 | | --- | | 12 | | 13 | | 14 | | 15 | | 16 | | 17 | | 18 | | 19 | | 20 | | 21 | | 23 | | 24 | | 25 | | 26 | | 27 | | 28 | | 29 | | 30 | | 31 | | 32 | | 33 | | 34 | | 35 | | 36 | | 37 | | 38 | | 39 | | 40 | | 41 | | 42 | | 43 | | 44 | | 45 | | 194 | | 196 | | 254 | | PRCCS Codes:   | 64 | | --- | | 105 | | 134 | | 135 | | 176 | |
| --- | --- | --- | --- | --- | --- | --- | --- | --- | --- | --- | --- | --- | --- | --- | --- | --- | --- | --- | --- | --- | --- | --- | --- | --- | --- | --- | --- | --- | --- | --- | --- | --- | --- | --- | --- | --- | --- | --- | --- | --- | --- | --- | --- |
